# Supplementary material for: Solution processed red organic light-emitting-diodes using an N -annulated perylene diimide fluorophore
Source: Royal Society of Chemistry journal article supplement (doi:10.1039/c9tc05584c), 2020-01-01
Supplement: c9tc05584c1.pdf [file c9tc05584c1.pdf]

## Supporting Information

# Solution Processed Red Organic Light-Emitting- Diodes using an N-Annulated Perylene Diimide Fluorophore

*Sergey V. Dayneko,<sup>a</sup> Mohammad Rahmati,<sup>b</sup> Majid Pahlevani,<sup>c,\*</sup> Gregory C. Welch<sup>a,\*</sup>*

<sup>a</sup>Department of Chemistry, University of Calgary, 731 Campus Place NW, Calgary, Alberta,  
Canada T2N 1N4

<sup>b</sup>Genoptic LED Inc, 6000 72<sup>nd</sup> Ave SE, Calgary, AB, Canada, T2C 5B1

<sup>c</sup>Department of Electrical and Computer Engineering, Queen's University, 19 Union St.,  
Kingston, ON, Canada, K7L 3N6

\*E-mail: [majid.pahlevani@queensu.ca](mailto:majid.pahlevani@queensu.ca) and [gregory.welch@ucalgary.ca](mailto:gregory.welch@ucalgary.ca)

### TABLE OF CONTENTS

|                                  |           |
|----------------------------------|-----------|
| <b>Materials and Methods</b>     | <b>S2</b> |
| <b>Characteristics of OLEDs.</b> | <b>S4</b> |

## 1. Materials and Methods

**Materials:** All chemicals/solvents were purchased from Millipore-Sigma and used without further purification. tPDI2N-EH was made as previously reported (Small Methods, 2018, 2, 180081). PFO and F8BT was purchased from Ossila.

**UV-Visible Spectroscopy (UV-Vis):** All optical absorption measurements were recorded using Agilent Technologies Cary 60 UV-Vis spectrometer at room temperature. Films were spin-cast onto Corning glass micro slides. Prior to use, glass slides were cleaned with soap and water, acetone and isopropanol, and followed by UV/ozone treatment using a Novascan UV/ozone cleaning system.

**Photoluminescence Quantum Yield (PLQY):** PLQY was measured by using the integrating sphere with Flame spectrometer (Ocean Optics). The QEX7 Solar Cell Spectral Response/QE/IPCE Measurement System (PV Measurement, Model QEX7) was used for selecting the excitation wavelength of the sample.

**Atomic Force Microscopy (AFM):** AFM measurements were performed by using a TT2- AFM (AFM Workshop) in tapping mode and WSxM software with a resonance frequency of 300 kHz, a force constant of 40 N/m and a reflective back side aluminum coating (Tap300A1-G, BudgetSensors). Samples for AFM measurements were the same ones that were used to collect the respective device parameters.

**OLED Device Fabrication and Testing (spin-coated):** OLED devices were fabricated on ITO-coated glass substrates (sheet resistance of 10 Ohm Sq<sup>-1</sup>). The ITO substrates were cleaned by sequentially ultra-sonicating in detergent/de-ionized water, acetone and isopropanol before use.

ITO substrates were pretreated under UV-ozone for 30 minutes. PEDOT:PSS was spin-coated onto the ITO-coated glass substrates at 3,000 rpm for 60s and annealed in air at 120°C.

*F8:F8BT:*

For deposition of the F8:F8BT active layer, the blend solution of F8:F8BT (ratio 19:1 at total concentration of 15 mg mL<sup>-1</sup>) dissolved in toluene was spin-cast at 2,000 rpm on top of the PEDOT:PSS layer in air.

*F8:tPDI2N-EH:*

For deposition of the F8:tPDI2N-EH active layer, the blend solution of F8:tPDI2N-EH (different ratio at total concentration of 15 mg mL<sup>-1</sup>) dissolved in toluene was spin-cast on top of the PEDOT:PSS layer in air.

Finally, the LiF (1 nm)/Ag (200 nm) electrode was deposited using a thermal evaporation system through a shadow mask under a base pressure of  $\sim 2 \times 10^{-6}$  torr. The device area was 9 mm<sup>2</sup> as defined by the overlapping area of the ITO films and top electrodes.

Current density-voltage (J-V) characteristics were measured using a Keithley 2612B source-meter combined with calibrated Si-photodiode and spectrometer.

## 2. Characteristics of OLEDs

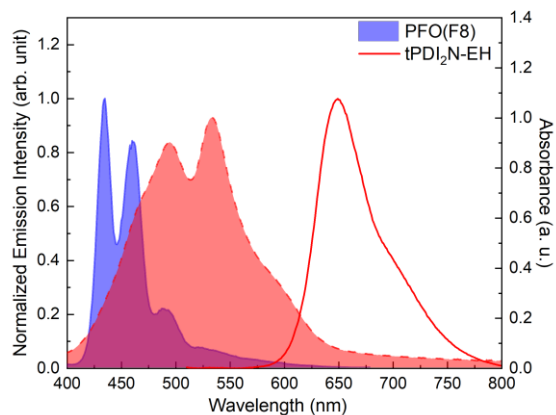

**Figure S1.** Normalized photoluminescence spectra of PFO (solid blue) and the optical absorption (solid red) and photoluminescence (solid white) spectra of tPDI<sub>2</sub>N-EH. Plot shows the overlapping of photoluminescence spectra of PFO and optical absorption of tPDI<sub>2</sub>N-EH films.

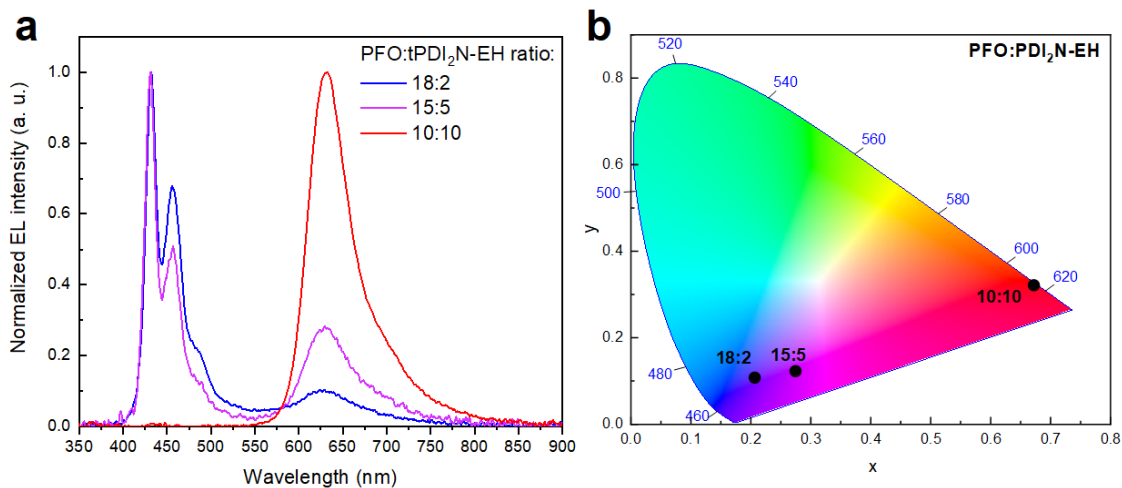

**Figure S2.** (a) Normalized electroluminescence (EL) and (b) color coordinates spectra of PFO:tPDI<sub>2</sub>N-EH-based OLEDs with different ratio of PFO and tPDI<sub>2</sub>N-EH.

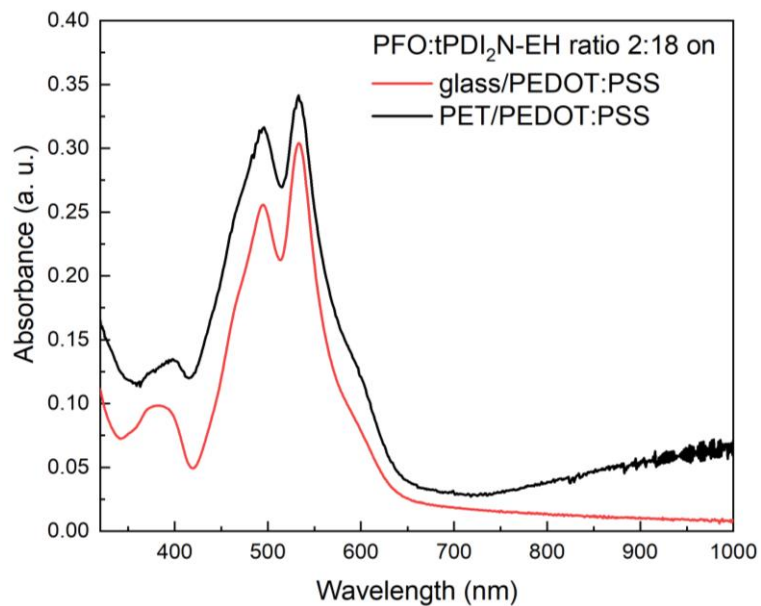

**Figure S3.** Optical absorption spectra of OLEDs based on PFO:tPDI<sub>2</sub>N-EH with ratio of 2:18, spin-cast on glass/ITO/PEDOT:PSS and slot-die coated on PET/ITO/PEDOT:PSS.
